# Supplementary material
Source: publisher site journal article supplement (https://www.dovepress.com/article/supplementary_file/578237/Supplementary%20Material.docx)
Supplement: Supplementary file 1 [file Supplementary%20Material.docx]

**Supplementary Material**

**Cognitive Reappraisal and Sleep Quality: A Serial Mediation Model Through Work Meaning and Perceived Stress**

This supplementary material provides additional results to support the main findings.

A confirmatory factor analysis was conducted to examine the factor structure of the 4-item reappraisal scale. The expected one-factor model showed good fit, χ2 (1) = 6.33, CFI = 0.99, TLI = 0.97, RMSEA = 0.08, SRMR = 0.01, after allowing the residuals of two closely related items to correlate based on modification indices reported in Mplus. All items loaded significantly on the latent factor, with standardized loadings ranging from .47 to .89 (all *ps* < .001). To evaluate convergent and discriminant validity of the reappraisal scale, we examined its correlations with theoretically relevant constructs. Reappraisal showed negative associations with perceived stress (r = –.28) and neuroticism (r = –.34), and positive associations with extraversion (r = .38) and meaningful work (r = .25), consistent with convergent validity. The moderate magnitudes of these correlations indicate that reappraisal is related to—but empirically distinct from—these constructs, thereby supporting discriminant validity.

Table S1 presents the full correlation matrix including all covariates. Table S2 reports the significant direct effects of covariates on study variables in the path analysis. To evaluate the robustness of the primary findings, we conducted three sets of sensitivity analyses. The results are presented in Tables S3–S6. Specifically, Table S3 shows model fit across sensitivity analysis conditions, and Tables S4–S6 present the corresponding path coefficients under each analytic condition.

Table S7 provides descriptive statistics and bivariate correlations among the primary study variables, including cognitive reappraisal, meaningful work, perceived stress, and the global PSQI score as well as its seven component scores, offering a detailed view of associations across specific sleep domains. Table S8 presents model fit indices for the hypothesized path model and a set of alternative path models, allowing comparison of model fit across different directional specifications. Finally, Figure S1 displays the complete path model including all covariates and their paths to endogenous variables, providing a visual overview of the full analytic model tested in the study, and Mplus code for the primary path analysis is also provided.

| **Table S1.** Full correlation matrix of study variables and candidate covariates | | | | | | | | | | | | | | | | | | | | | | | | | |
| --- | --- | --- | --- | --- | --- | --- | --- | --- | --- | --- | --- | --- | --- | --- | --- | --- | --- | --- | --- | --- | --- | --- | --- | --- | --- |
| Variables | M | SD | 1 | 2 | 3 | 4 | 5 | 6 | 7 | 8 | 9 | 10 | 11 | 12 | 13 | 14 | 15 | 16 | 17 | 18 | 19 | 20 | 21 | 22 | 23 |
| 1. Cognitive reappraisal | 3.06 | 0.61 |  |  |  |  |  |  |  |  |  |  |  |  |  |  |  |  |  |  |  |  |  |  |  |
| 2. Work meaning | 5.26 | 1.38 | .25** |  |  |  |  |  |  |  |  |  |  |  |  |  |  |  |  |  |  |  |  |  |  |
| 3. Perceived stress | 22.08 | 6.12 | -.29*** | -.25*** |  |  |  |  |  |  |  |  |  |  |  |  |  |  |  |  |  |  |  |  |  |
| 4. Sleep quality | 5.62 | 3.03 | -.10** | -.10** | .35*** |  |  |  |  |  |  |  |  |  |  |  |  |  |  |  |  |  |  |  |  |
| 5. Age | 48.49 | 10.25 | .07* | .06 | -.16*** | -.04 |  |  |  |  |  |  |  |  |  |  |  |  |  |  |  |  |  |  |  |
| 6. Genger | 0.49 | 0.50 | .11** | .04 | .10** | .14*** | -.02 |  |  |  |  |  |  |  |  |  |  |  |  |  |  |  |  |  |  |
| 7. Race | 0.89 | 0.31 | -.02 | .00 | -.04 | -.03 | .03 | -.04 |  |  |  |  |  |  |  |  |  |  |  |  |  |  |  |  |  |
| 8. Education | 8.22 | 2.31 | .00 | .24*** | -.11** | -.10** | -.03 | -.03 | .02 |  |  |  |  |  |  |  |  |  |  |  |  |  |  |  |  |
| 9. Log total income | 4.83 | 0.67 | -.01 | .07* | -.09** | -.05 | .01 | -.10** | .03 | .14*** |  |  |  |  |  |  |  |  |  |  |  |  |  |  |  |
| 10. Financial situation | 6.45 | 2.00 | .12** | .15*** | -.31*** | -.18*** | .11** | -.11 | .03 | .19*** | .15*** |  |  |  |  |  |  |  |  |  |  |  |  |  |  |
| 11. Marital status | 0.73 | 0.44 | .00 | .02 | -.08* | -.07* | .02 | -.17*** | .03 | .03 | .25*** | .16*** |  |  |  |  |  |  |  |  |  |  |  |  |  |
| 12. Health status | 0.89 | 0.31 | -.03 | -.06 | .09* | .16*** | .19*** | .04 | .01 | .02 | -.01 | -.07* | .00 |  |  |  |  |  |  |  |  |  |  |  |  |
| 13. Log depression | 0.10 | 0.26 | -.12*** | -.08 | .21*** | .22*** | -.09* | .13*** | .09* | -.10* | -.07* | -.12*** | -.16*** | .07* |  |  |  |  |  |  |  |  |  |  |  |
| 14. Log CTQ | 0.85 | 0.13 | -.07* | -.13*** | .31*** | .27*** | -.02 | .12** | -.01 | -.14*** | -.09* | -.20*** | -.07* | .15*** | .24*** |  |  |  |  |  |  |  |  |  |  |
| 15. Body mass index | 29.30 | 6.12 | -.02 | -.02 | .10** | .09** | .04 | -.02 | -.02 | -.16*** | -.01 | -.11** | -.05 | .15*** | .14*** | .15*** |  |  |  |  |  |  |  |  |  |
| 16. Alcohol use | 4.36 | 1.50 | .04 | -.01 | .04 | .00 | -.07* | .16*** | -.06 | -.11** | -.09* | -.10** | -.08* | -.02 | .06 | .05 | .15*** |  |  |  |  |  |  |  |  |
| 17.Smoking status | 0.09 | 0.29 | -.02 | -.01 | .03 | .03 | .02 | .00 | .00 | .04 | .03 | .03 | .03 | -.06 | .06 | -.01 | -.04 | -.03 |  |  |  |  |  |  |  |
| 18. Regular exercise | 0.80 | 0.40 | .00 | .04 | -.08* | -.05 | -.04 | -.01 | .02 | .14*** | .05 | .15*** | .08* | -.04 | -.01 | -.08* | -.15*** | -.06 | .02 |  |  |  |  |  |  |
| 19. Work hours | 42.42 | 10.28 | -.01 | .01 | .00 | -.04 | -.03 | -.23*** | -.03 | .14*** | .12** | .02 | .03 | -.05 | -.04 | .00 | .04 | -.07* | .00 | -.04 |  |  |  |  |  |
| 20. Job demand | 15.41 | 3.08 | -.04 | .01 | .24*** | .08* | -.11** | .07 | 0.06 | 0.15*** | .07* | -.05 | -.03 | .03 | .12** | .15*** | .01 | -.09** | -.02 | .05 | .29*** |  |  |  |  |
| 21. Skill discretion | 10.79 | 2.17 | .16*** | .28*** | -.12** | -.05 | .03 | .03 | -.06 | .23*** | .09** | .20*** | .06 | -.01 | -.07* | -.06 | -.03 | -.08* | -.02 | .04 | .15*** | .24*** |  |  |  |
| 22. Decision authority | 21.96 | 4.35 | .15*** | .19*** | -.15*** | -.12** | .03 | -.05 | -.03 | .18*** | .08* | .25*** | .11** | .00 | -.09** | -.11** | -.04 | -.12*** | .02 | .10** | .19*** | .09** | .53*** |  |  |
| 23. Supervisor support | 10.68 | 2.63 | .11** | .07* | -.13*** | -.06 | .07* | .00 | -.05 | -.02 | .07 | .08* | .01 | .00 | -.10** | -.14** | -.03 | .03 | .02 | .01 | -.06 | -.28*** | .22*** | .18*** |  |
| 24. Log work nights | 0.47 | 0.68 | .00 | .07* | .01 | .04 | -.09** | -.20*** | -.02 | .09** | .09** | .11** | .06 | -.06 | -.04 | -.01 | .02 | -.04 | .08 | .07 | .26*** | .06 | .21*** | .17*** | .02 |

Note*. N* = 852. Total household income, depression, CTQ, and work nights (i.e., nights away for work) were log-transformed due to positive skewness. **p* < .05. ***p* < .01. ****p* < .001.

| **Table S2.** Significant Direct Path Coefficients in the Path Analysis | | | | | | | | | | |
| --- | --- | --- | --- | --- | --- | --- | --- | --- | --- | --- |
| **Covariate** | **Outcome variable** | | ***B*** | | **SE** | | **CI** | | | |
| Cognitive reappraisal | Meaningful work | | 0.49*** | | 0.08 | | [0.34, 0.64] | | | |
| Education | Meaningful work | | 0.11*** | | 0.02 | | [0.08, 0.15] | | | |
| Skill discretion | Meaningful work | | 0.13*** | | 0.02 | | [0.09, 0.17] | | | |
|  |  | |  | |  | | R2 = 0.16** | | | |
| Meaningful work | Perceived stress | | -0.64*** | | 0.14 | | [-0.90, -0.37] | | | |
| Cognitive reappraisal | Perceived stress | | -2.14*** | | 0.30 | | [-2.72, -1.55] | | | |
| Age | Perceived stress | | -0.05** | | 0.02 | | [-0.09, -0.02] | | | |
| Gender | Perceived stress | | 0.88* | | 0.36 | | [0.17, 1.60] | | | |
| Financial situation | Perceived stress | | -0.60*** | | 0.11 | | [-0.81, -0.39] | | | |
| Log CTQ | Perceived stress | | 9.41*** | | 1.67 | | [6.16, 12.67] | | | |
| Job demand | Perceived stress | | 0.36*** | | 0.06 | | [0.24, 0.48] | | | |
|  |  | |  | |  | | R2 = 0.28** | | | |
| Perceived stress | Sleep quality | | 0.13*** | | 0.02 | | [0.10, 0.17] | | | |
| Gender | Sleep quality | | 0.45* | | 0.20 | | [0.07, 0.83] | | | |
| Health status | Sleep quality | | 1.00*** | | 0.26 | | [0.49, 1.50] | | | |
| Log depression | Sleep quality | | 1.31** | | 0.45 | | [0.43, 2.19] | | | |
| Log CTQ | Sleep quality | | 3.31*** | | 0.88 | | [1.60, 5.01] | | | |
| R2 = 0.18** | | | | | | | | | | |
| **p* < .05. ***p* < .01. ****p* < .001.  **Table S3.** Model Fit Across Sensitivity Analysis Conditions | | | | | | | | |
| **Data/Analysis Condition** | | **χ2(df)** | | **CFI** | | **TLI** | | **RMSEA** | | **SRMR** | |
| Full Sample  (FIML, with covariates) | | 26.48 (18) | | 0.98 | | 0.97 | | 0.02 | | 0.02 | |
| Full Sample  (listwise deletion) | | 25.76 (18) | | 0.99 | | 0.97 | | 0.02 | | 0.02 | |
| Full Sample (no covariates) | | 0.06 (2) | | 1.00 | | 1.02 | | 0.00 | | 0.00 | |
| MIDUS 2 only | | 18.31 (18) | | 1.00 | | 1.02 | | 0.01 | | 0.01 | |
| MIDUS Refresher only | | 24.13 (18) | | 0.97 | | 0.95 | | 0.03 | | 0.03 | |

| **Table S4.** Path Coefficients Using FIML and Listwise Deletion | | | | | | |
| --- | --- | --- | --- | --- | --- | --- |
|  |  | **FIML** | |  | **Listwise Deletion** | |
| **Path** |  | ***B*(*S.E*)** | **95%CI** |  | ***B*(*S.E*)** | **95%CI** |
| **Direct Effects** |  |  |  |  |  |  |
| Cognitive reappraisal → Meaningful Work |  | 0.49 (0.08) | [0.34, 0.64] |  | 0.47 (0.08) | [0.32, 0.62] |
| Cognitive reappraisal → Perceived Stress |  | -2.14 (0.30) | [-2.72, -1.55] |  | -2.17 (0.31) | [-2.75, -1.58] |
| Meaningful Work → Perceived Stress |  | -0.64 (0.14) | [-0.90, -0.37] |  | -0.66 (0.14) | [-0.93, -0.39] |
| Perceived Stress → Sleep Quality |  | 0.13 (0.02) | [0.10, 0.17] |  | 0.13 (0.02) | [0.10, 0.17] |
| **Indirect Effects** |  |  |  |  |  |  |
| Cognitive Reappraisal → Meaningful Work → Perceived Stress |  | -0.31 (0.08) | [-0.47, -0.16] |  | -0.31 (0.08) | [-0.46, -0.16] |
| Meaningful Work → Perceived Stress→ Sleep Quality |  | -0.09 (0.08) | [-0.13, -0.04] |  | -0.09 (0.02) | [-0.13, -0.04] |
| Cognitive Reappraisal → Meaningful Work → Perceived Stress → Sleep Quality |  | -0.04 (0.01) | [-0.07, -0.02] |  | -0.04 (0.01) | [-0.06, -0.02] |

| **Table S5.** Path Coefficients With and Without Covariate Adjustment | | | | | | |
| --- | --- | --- | --- | --- | --- | --- |
|  |  | **With Covariates** | |  | **Without Covariates** | |
| **Path** |  | ***B*(*S.E*)** | **95%CI** |  | ***B*(*S.E*)** | **95%CI** |
| **Direct Effects** |  |  |  |  |  |  |
| Cognitive Reappraisal → Meaningful Work |  | 0.49 (0.08) | [0.34, 0.64] |  | 0.57 (0.08) | [0.42, 0.72] |
| Cognitive reappraisal → Perceived Stress |  | -2.14 (0.30) | [-2.72, -1.55] |  | -2.42 (0.33) | [-3.08, -1.78] |
| Meaningful Work → Perceived Stress |  | -0.64 (0.14) | [-0.90, -0.37] |  | -0.85 (0.15) | [-1.15, -0.56] |
| Perceived Stress → Sleep Quality |  | 0.13 (0.02) | [0.10, 0.17] |  | 0.18 (0.02) | [0.14, 0.21] |
| **Indirect Effects** |  |  |  |  |  |  |
| Cognitive Reappraisal → Meaningful Work → Perceived Stress |  | -0.31 (0.08) | [-0.47, -0.16] |  | -0.49 (0.10) | [-0.69, -0.28] |
| Meaningful Work → Perceived Stress→ Sleep Quality |  | -0.09 (0.08) | [-0.13, -0.04] |  | -0.15 (0.03) | [-0.21, -0.09] |
| Cognitive Reappraisal → Meaningful Work → Perceived Stress → Sleep Quality |  | -0.04 (0.01) | [-0.07, -0.02] |  | -0.09 (0.02) | [-0.13, -0.04] |

| **Table S6.** Path Coefficient by MIDUS Cohort | | | | | | |
| --- | --- | --- | --- | --- | --- | --- |
|  |  | **MIDUS 2** | |  | **MIDUS Refresher** | |
| **Path** |  | ***B*(*S.E*)** | **95%CI** |  | ***B*(*S.E*)** | **95%CI** |
| **Direct Effects** |  |  |  |  |  |  |
| Cognitive Reappraisal → Meaningful Work |  | 0.50 (0.10) | [0.31, 0.69] |  | 0.48 (0.12) | [0.25, 0.71] |
| Cognitive reappraisal → Perceived Stress |  | -2.03 (0.39) | [-2.79, -1.27] |  | -2.33 (0.46) | [-3.23, -1.44] |
| Meaningful Work → Perceived Stress |  | -0.66 (0.19) | [-1.03, -0.29] |  | -0.60 (0.20) | [-0.98, -0.23] |
| Perceived Stress → Sleep Quality |  | 0.12 (0.02) | [0.08, 0.17] |  | 0.15 (0.03) | [0.10, 0.20] |
| **Indirect Effects** |  |  |  |  |  |  |
| Cognitive Reappraisal → Meaningful Work → Perceived Stress |  | -0.33 (0.11) | [-0.54, -0.12] |  | -0.29 (0.12) | [-0.52, -0.06] |
| Meaningful Work → Perceived Stress→ Sleep Quality |  | -0.09 (0.03) | [-0.13, -0.03] |  | -0.08 (0.03) | [-0.16, -0.02] |
| Cognitive Reappraisal → Meaningful Work → Perceived Stress → Sleep Quality |  | -0.04 (0.02) | [-0.07, -0.01] |  | -0.04 (0.02) | [-0.08, -0.01] |

| | **Table S7.** Descriptive Statistics and Correlations Among Cognitive Reappraisal, Meaningful Work, Perceived Stress, and PSQI Sleep Components | | | | | | | | | | | | | | | --- | --- | --- | --- | --- | --- | --- | --- | --- | --- | --- | --- | --- | --- | | Variables | M | SD |  | 1 | 2 | 3 | 4 | 5 | 6 | 7 | 8 | 9 | 10 | | 1. Cognitive reappraisal | 3.06 | 0.61 |  |  |  |  |  |  |  |  |  |  |  | | 2. Meaningful work | 5.26 | 1.38 |  | 0.25** |  |  |  |  |  |  |  |  |  | | 3. Perceived stress | 22.08 | 6.12 |  | -0.29** | -0.25** |  |  |  |  |  |  |  |  | | 4. Sleep quality (global score) | 5.62 | 3.03 |  | -0.1** | -0.1** | 0.35** |  |  |  |  |  |  |  | | 5. Subjective sleep quality | 0.95 | 0.63 |  | -0.1** | -0.1** | 0.27** | 0.68** |  |  |  |  |  |  | | 6. Sleep latency | 0.83 | 0.84 |  | -0.04 | -0.03 | 0.18** | 0.68** | 0.4** |  |  |  |  |  | | 7. Sleep duration | 0.83 | 0.71 |  | -0.03 | -0.08* | 0.12** | 0.53** | 0.33** | 0.19** |  |  |  |  | | 8. Habitual sleep efficiency | 0.56 | 1.08 |  | 0.03 | -0.04 | 0.08* | 0.64** | 0.2** | 0.18** | 0.29** |  |  |  | | 9. Sleep disturbances | 1.22 | 0.53 |  | -0.08* | -0.08* | 0.24** | 0.52** | 0.3** | 0.34** | 0.08* | 0.07* |  |  | | 10. Use of sleeping medication | 0.49 | 0.99 |  | -0.04 | 0.04 | 0.10** | 0.53** | 0.2** | 0.26** | 0.01 | 0.04 | 0.2** |  | | 11. Daytime dysfunction | 0.83 | 0.67 |  | -0.21** | -0.18** | 0.45** | 0.49** | 0.29** | 0.18** | 0.18** | 0.09** | 0.22** | .11** |   **Table S8.** Model Fit Indices for the Hypothesized and Alternative Path Models | | | | | | | | |
| --- | --- | --- | --- | --- | --- | --- | --- | --- | --- | --- | --- | --- | --- | --- | --- | --- | --- | --- | --- | --- | --- | --- | --- | --- | --- | --- | --- | --- | --- | --- | --- | --- | --- | --- | --- | --- | --- | --- | --- | --- | --- | --- | --- | --- | --- | --- | --- | --- | --- | --- | --- | --- | --- | --- | --- | --- | --- | --- | --- | --- | --- | --- | --- | --- | --- | --- | --- | --- | --- | --- | --- | --- | --- | --- | --- | --- | --- | --- | --- | --- | --- | --- | --- | --- | --- | --- | --- | --- | --- | --- | --- | --- | --- | --- | --- | --- | --- | --- | --- | --- | --- | --- | --- | --- | --- | --- | --- | --- | --- | --- | --- | --- | --- | --- | --- | --- | --- | --- | --- | --- | --- | --- | --- | --- | --- | --- | --- | --- | --- | --- | --- | --- | --- | --- | --- | --- | --- | --- | --- | --- | --- | --- | --- | --- | --- | --- | --- | --- | --- | --- | --- | --- | --- | --- | --- | --- | --- | --- | --- | --- | --- | --- | --- | --- | --- | --- | --- | --- | --- | --- | --- | --- | --- | --- | --- | --- | --- | --- | --- | --- | --- | --- | --- | --- | --- | --- | --- | --- | --- | --- |
| Model | | χ2(*df*) CFI TLC RMSEA SRMR AIC BIC | | | | | | |
| Hypothesized model (cognitive reappraisal → meaningful work → perceived stress → sleep quality, cognitive reappraisal → perceived stress) | | | | | | | | |
|  | 26.48(18)* | | 0.98 | 0.97 | 0.02 | 0.02 | 35690.46 | 35790.16 |
| Model 1 (sleep quality → perceived stress → meaningful work → cognitive reappraisal) | | | | | | | | |
|  | 117.89(28)* | | 0.85 | 0.77 | 0.06 | 0.04 | 35790.35 | 35894.80 |
| Model 2 (cognitive reappraisal → meaningful work → sleep quality → perceived stress, cognitive reappraisal → perceived stress) | | | | | | | | |
|  | 52.42(18)* | | 0.94 | 0.88 | 0.06 | 0.03 | 35718.11 | 35817.81 |
| Model 3 (cognitive reappraisal → meaningful work → sleep quality, cognitive reappraisal → perceived stress → sleep quality) | | | | | | | | |
|  | 47.47(18)* | | 0.95 | 0.90 | 0.06 | 0.03 | 35712.58 | 35812.29 |
| *Note*. * *p* < .01 | | | | | | | | |

Figure S1. Path Model Including All Covariates


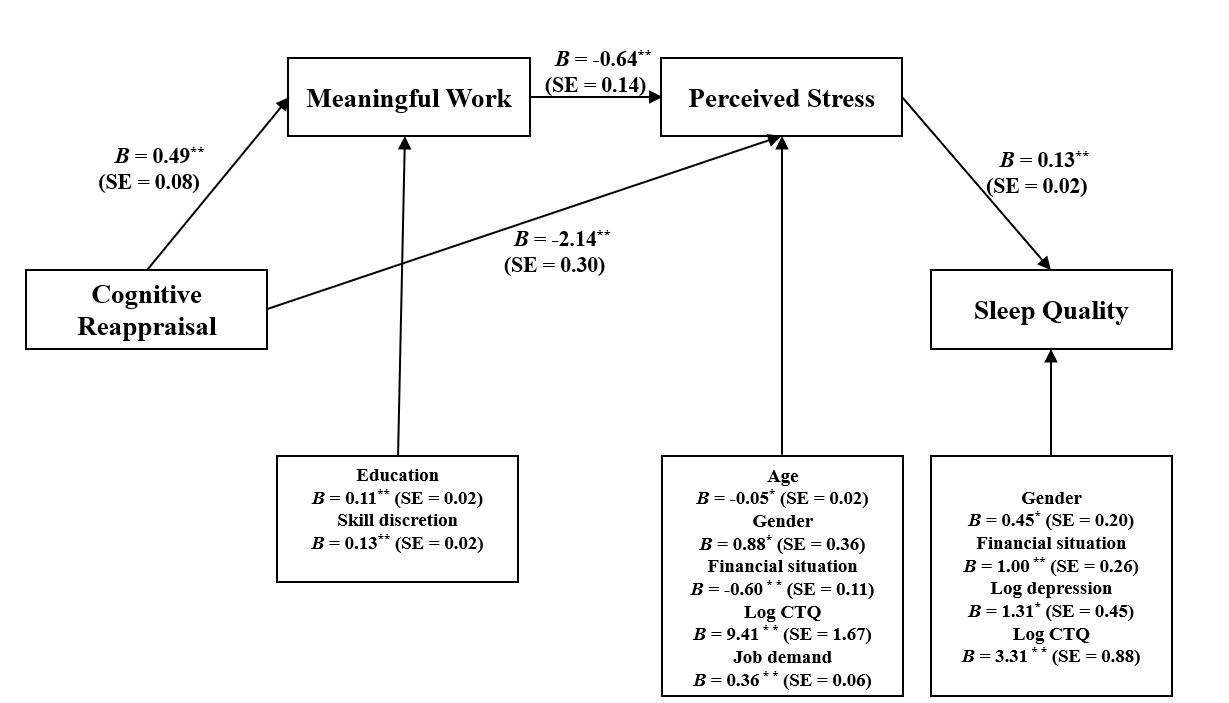


**Mplus Code for the Primary Path Analysis**

! CR(cognitive reappraisal), edu(education), f_s(financial situation), log_dep(log depression), log_ctq(log CTQ), SD (skill discretion),

! demand(job demand), h_s(health status)

usevariables are age gender edu f_s h_s log_dep log_ctq demand SD CR meaning stress sleep ;

ANALYSIS:

Estimator = MLR;

model :

meaning on CR (a);

stress on meaning (b);

sleep on stress (c);

stress on CR (a2);

meaning on edu SD ;

stress on age gender f_S log_ctq demand;

sleep on gender h_s log_dep log_ctq ;

Model constraint: new ( ab bc abc a2c);

ab = a*b; bc = b*c; abc = a*b*c; a2c = a2*c;

OUTPUT: standardized STAND;
